# Supplementary material
Source: publisher figshare collection journal article supplement (https://acs.figshare.com/ndownloader/files/5101216)
Supplement: Supplementary file 1 [file 5101216]

Archive with 246 entries (232 files):
- META-INF/
- META-INF/MANIFEST.MF
- org/
- org/jmol/
- org/jmol/adapter/
- org/jmol/adapter/smarter/
- org/jmol/api/
- org/jmol/applet/
- org/jmol/g3d/
- org/jmol/viewer/
- org/openscience/
- org/openscience/jmol/
- org/openscience/jmol/ui/
- JmolApplet.class
- JmolAppletControl.class
- org/jmol/adapter/smarter/Atom.class
- org/jmol/adapter/smarter/AtomSetCollection.class
- org/jmol/adapter/smarter/AtomSetCollectionReader.class
- org/jmol/adapter/smarter/Bond.class
- org/jmol/adapter/smarter/CifReader$RidiculousFileFormatTokenizer.class
- org/jmol/adapter/smarter/CifReader.class
- org/jmol/adapter/smarter/CmlReader$CmlHandler.class
- org/jmol/adapter/smarter/CmlReader.class
- org/jmol/adapter/smarter/FractionalAtom.class
- org/jmol/adapter/smarter/GamessReader.class
- org/jmol/adapter/smarter/GaussianReader.class
- org/jmol/adapter/smarter/GhemicalMMReader.class
- org/jmol/adapter/smarter/HinReader.class
- org/jmol/adapter/smarter/JaguarReader.class
- org/jmol/adapter/smarter/JmeReader.class
- org/jmol/adapter/smarter/LimitedLineReader.class
- org/jmol/adapter/smarter/MolReader.class
- org/jmol/adapter/smarter/MopacReader.class
- org/jmol/adapter/smarter/NWChemReader.class
- org/jmol/adapter/smarter/PdbReader.class
- org/jmol/adapter/smarter/QchemReader.class
- org/jmol/adapter/smarter/Resolver.class
- org/jmol/adapter/smarter/ShelxReader.class
- org/jmol/adapter/smarter/SmarterJmolAdapter$AtomIterator.class
- org/jmol/adapter/smarter/SmarterJmolAdapter$BondIterator.class
- org/jmol/adapter/smarter/SmarterJmolAdapter$StructureIterator.class
- org/jmol/adapter/smarter/SmarterJmolAdapter.class
- org/jmol/adapter/smarter/SpartanReader.class
- org/jmol/adapter/smarter/Structure.class
- org/jmol/adapter/smarter/XyzReader.class
- org/jmol/api/JmolAdapter$AtomIterator.class
- org/jmol/api/JmolAdapter$BondIterator.class
- org/jmol/api/JmolAdapter$Logger.class
- org/jmol/api/JmolAdapter$StructureIterator.class
- org/jmol/api/JmolAdapter.class
- org/jmol/api/JmolSimpleViewer.class
- org/jmol/api/JmolStatusListener.class
- org/jmol/api/JmolViewer.class
- org/jmol/applet/Console$ShiftEnterTextArea.class
- org/jmol/applet/Console.class
- org/jmol/applet/JmolApplet$LoadPopupThread.class
- org/jmol/applet/JmolApplet$MyStatusListener.class
- org/jmol/applet/JmolApplet.class
- org/jmol/applet/JmolAppletControl.class
- org/jmol/applet/JmolAppletRegistry.class
- org/jmol/applet/Jvm12.class
- org/jmol/g3d/Awt3D.class
- org/jmol/g3d/Circle3D.class
- org/jmol/g3d/Colix.class
- org/jmol/g3d/Cylinder3D.class
- org/jmol/g3d/Font3D.class
- org/jmol/g3d/Graphics3D.class
- org/jmol/g3d/Hermite3D.class
- org/jmol/g3d/Line3D.class
- org/jmol/g3d/Platform3D$ClearingThread.class
- org/jmol/g3d/Platform3D.class
- org/jmol/g3d/Shade3D.class
- org/jmol/g3d/Sphere3D.class
- org/jmol/g3d/Swing3D.class
- org/jmol/g3d/Text3D.class
- org/jmol/g3d/Triangle3D.class
- org/jmol/g3d/Xyzd.class
- org/jmol/viewer/AlphaMonomer.class
- org/jmol/viewer/AlphaPolymer.class
- org/jmol/viewer/AminoMonomer.class
- org/jmol/viewer/AminoPolymer.class
- org/jmol/viewer/Atom.class
- org/jmol/viewer/AtomIterator.class
- org/jmol/viewer/Axes.class
- org/jmol/viewer/AxesRenderer.class
- org/jmol/viewer/Backbone$Bbpolymer.class
- org/jmol/viewer/Backbone.class
- org/jmol/viewer/BackboneRenderer.class
- org/jmol/viewer/Balls.class
- org/jmol/viewer/BallsRenderer.class
- org/jmol/viewer/Bbcage.class
- org/jmol/viewer/BbcageRenderer.class
- org/jmol/viewer/Bond.class
- org/jmol/viewer/BondIterator.class
- org/jmol/viewer/Bspf.class
- org/jmol/viewer/Bspt$Element.class
- org/jmol/viewer/Bspt$Leaf.class
- org/jmol/viewer/Bspt$Node.class
- org/jmol/viewer/Bspt$SphereIterator.class
- org/jmol/viewer/Bspt$Tuple.class
- org/jmol/viewer/Bspt.class
- org/jmol/viewer/Cartoon$Cchain.class
- org/jmol/viewer/Cartoon.class
- org/jmol/viewer/CartoonRenderer.class
- org/jmol/viewer/Chain.class
- org/jmol/viewer/Closest.class
- org/jmol/viewer/ColorManager.class
- org/jmol/viewer/Compiler.class
- org/jmol/viewer/Context.class
- org/jmol/viewer/Dots$Cavity.class
- org/jmol/viewer/Dots$Torus.class
- org/jmol/viewer/Dots.class
- org/jmol/viewer/DotsRenderer$Geodesic.class
- org/jmol/viewer/DotsRenderer.class
- org/jmol/viewer/Echo$Text.class
- org/jmol/viewer/Echo.class
- org/jmol/viewer/EchoRenderer.class
- org/jmol/viewer/Eval.class
- org/jmol/viewer/FileManager$FileOpenThread.class
- org/jmol/viewer/FileManager.class
- org/jmol/viewer/Frame$SelectedBondIterator.class
- org/jmol/viewer/Frame$WithinIterator.class
- org/jmol/viewer/Frame.class
- org/jmol/viewer/FrameExportJmolAdapter$AtomIterator.class
- org/jmol/viewer/FrameExportJmolAdapter$BondIterator.class
- org/jmol/viewer/FrameExportJmolAdapter.class
- org/jmol/viewer/FrameRenderer.class
- org/jmol/viewer/Frank.class
- org/jmol/viewer/FrankRenderer.class
- org/jmol/viewer/Group.class
- org/jmol/viewer/Helix.class
- org/jmol/viewer/Hover.class
- org/jmol/viewer/HoverRenderer.class
- org/jmol/viewer/Hsticks.class
- org/jmol/viewer/HsticksRenderer.class
- org/jmol/viewer/JmolConstants.class
- org/jmol/viewer/Labels.class
- org/jmol/viewer/LabelsRenderer.class
- org/jmol/viewer/Measurement.class
- org/jmol/viewer/Measures.class
- org/jmol/viewer/MeasuresRenderer.class
- org/jmol/viewer/MeshRibbon$Schain.class
- org/jmol/viewer/MeshRibbon.class
- org/jmol/viewer/MeshRibbonRenderer.class
- org/jmol/viewer/Mmset$Structure.class
- org/jmol/viewer/Mmset.class
- org/jmol/viewer/Model.class
- org/jmol/viewer/ModelManager.class
- org/jmol/viewer/MonitorInputStream.class
- org/jmol/viewer/Monomer.class
- org/jmol/viewer/MouseManager$HoverWatcher.class
- org/jmol/viewer/MouseManager.class
- org/jmol/viewer/MouseManager10.class
- org/jmol/viewer/MouseManager11.class
- org/jmol/viewer/MouseManager14.class
- org/jmol/viewer/MouseWrapper11.class
- org/jmol/viewer/MouseWrapper14.class
- org/jmol/viewer/Mps$Mpsmodel.class
- org/jmol/viewer/Mps$Mpspolymer.class
- org/jmol/viewer/Mps.class
- org/jmol/viewer/MpsRenderer.class
- org/jmol/viewer/NucleicMonomer.class
- org/jmol/viewer/NucleicPolymer.class
- org/jmol/viewer/PendingMeasurement.class
- org/jmol/viewer/PhosphorusMonomer.class
- org/jmol/viewer/PhosphorusPolymer.class
- org/jmol/viewer/PickingManager.class
- org/jmol/viewer/Polymer.class
- org/jmol/viewer/ProteinStructure.class
- org/jmol/viewer/Prueba.class
- org/jmol/viewer/PruebaRenderer.class
- org/jmol/viewer/RepaintManager$AnimationThread.class
- org/jmol/viewer/RepaintManager.class
- org/jmol/viewer/Ribbons$Schain.class
- org/jmol/viewer/Ribbons.class
- org/jmol/viewer/RibbonsRenderer.class
- org/jmol/viewer/Rockets$Cchain.class
- org/jmol/viewer/Rockets.class
- org/jmol/viewer/RocketsRenderer.class
- org/jmol/viewer/ScriptException.class
- org/jmol/viewer/SelectionIndependentShape.class
- org/jmol/viewer/SelectionManager.class
- org/jmol/viewer/Shape.class
- org/jmol/viewer/ShapeRenderer.class
- org/jmol/viewer/Sheet.class
- org/jmol/viewer/Sssticks.class
- org/jmol/viewer/SssticksRenderer.class
- org/jmol/viewer/Sticks.class
- org/jmol/viewer/SticksRenderer.class
- org/jmol/viewer/Strands$Schain.class
- org/jmol/viewer/Strands.class
- org/jmol/viewer/StrandsRenderer.class
- org/jmol/viewer/StyleManager.class
- org/jmol/viewer/TempManager.class
- org/jmol/viewer/Token.class
- org/jmol/viewer/Trace$Tchain.class
- org/jmol/viewer/Trace.class
- org/jmol/viewer/TraceRenderer.class
- org/jmol/viewer/TransformManager$SpinThread.class
- org/jmol/viewer/TransformManager$VibrationThread.class
- org/jmol/viewer/TransformManager.class
- org/jmol/viewer/Turn.class
- org/jmol/viewer/Uccage.class
- org/jmol/viewer/UccageRenderer.class
- org/jmol/viewer/Util.class
- org/jmol/viewer/Vectors.class
- org/jmol/viewer/VectorsRenderer.class
- org/jmol/viewer/Viewer$NullAtomIterator.class
- org/jmol/viewer/Viewer$NullBondIterator.class
- org/jmol/viewer/Viewer.class
- org/openscience/jmol/ui/JmolPopup$MenuItemListener.class
- org/openscience/jmol/ui/JmolPopup.class
- org/openscience/jmol/ui/JmolPopupAwt$CheckboxMenuItemListener.class
- org/openscience/jmol/ui/JmolPopupAwt.class
- org/openscience/jmol/ui/JmolPopupStructure.properties
- org/openscience/jmol/ui/JmolPopupSwing$CheckboxMenuItemListener.class
- org/openscience/jmol/ui/JmolPopupSwing.class
- org/openscience/jmol/ui/JmolPopupWords.properties
- org/openscience/jmol/ui/JmolPopupWords_es.properties
- org/openscience/jmol/ui/JmolPopupWords_fr.properties
- org/openscience/jmol/ui/JmolPopupWords_nl.properties
- org/openscience/jmol/ui/PopupResourceBundle.class
- javax/
- javax/vecmath/
- javax/vecmath/AxisAngle4f.class
- javax/vecmath/Matrix3d.class
- javax/vecmath/Matrix3f.class
- javax/vecmath/Matrix4f.class
- javax/vecmath/Point2d.class
- javax/vecmath/Point3d.class
- javax/vecmath/Point3f.class
- javax/vecmath/Point3i.class
- javax/vecmath/Point4d.class
- javax/vecmath/Point4f.class
- javax/vecmath/Quat4d.class
- javax/vecmath/Quat4f.class
- javax/vecmath/SingularMatrixException.class
- javax/vecmath/Tuple2d.class
- javax/vecmath/Tuple3d.class
- javax/vecmath/Tuple3f.class
- javax/vecmath/Tuple3i.class
- javax/vecmath/Tuple4d.class
- javax/vecmath/Tuple4f.class
- javax/vecmath/Vector3d.class
- javax/vecmath/Vector3f.class
- javax/vecmath/Vector4f.class
