# Supplementary material
Source: publisher figshare collection journal article supplement (https://acs.figshare.com/ndownloader/files/5101216)
Supplement: Supplementary file 1 [file 5101216 › META-INF/MANIFEST.MF]

Manifest-Version: 1.0
Ant-Version: Apache Ant 1.6.2
Created-By: 1.5.0-b64 (Sun Microsystems Inc.)
