# Supplementary material
Source: publisher figshare collection journal article supplement (https://acs.figshare.com/ndownloader/files/5101216)
Supplement: Supplementary file 1 [file 5101216 › org/openscience/jmol/ui/JmolPopupWords_es.properties]

# Localized texts for the Jmol popup menu.
# Spanish translation for Spain (es_ES)
# Translated from default version : Jmol.properties (v ??)
# $Id: JmolPopupWords_es.properties,v 1.3 2004/05/14 19:44:53 egonw Exp $

red=Rojo
green=Verde
blue=Azul

fruitMenu=Frutas
apple=Manzana
banana=Platano
orange=Naranja
