# Supplementary material
Source: publisher figshare collection journal article supplement (https://acs.figshare.com/ndownloader/files/5101216)
Supplement: Supplementary file 1 [file 5101216 › org/openscience/jmol/ui/JmolPopupWords_fr.properties]

# Localized texts for the Jmol popup menu.
# French translation for France (fr_FR)
# Translated from default version : JmolPopupWords.properties (v 1.33)
# $Id: JmolPopupWords_fr.properties,v 1.4 2004/12/14 19:57:33 nicove Exp $

modelSetInfoMenu=Aucun atome charg\u00E9

selectMenu=S\u00E9lectionner

setSelectModeMenu=Changer le mode de s\u00E9lection
replace=Remplacer la s\u00E9lection
add=Ajouter \u00E0 la s\u00E9lection (OU)
narrow=Restreindre la s\u00E9lection (ET)

selectAll=Tout
selectNone=Aucun

elementsComputedMenu=El\u00E9ment

proteinMenu=Prot\u00E9ine
allProtein=Tout
proteinBackbone=Squelette
proteinSideChains=Cha\u00EEne lat\u00E9rale
polar=R\u00E9sidus polaires
nonpolar=R\u00E9sidus non polaires
positiveCharge=R\u00E9sidus basiques (+)
negativeCharge=Residus acides (-)
noCharge=R\u00E9sidus non charg\u00E9s
aaresiduesComputedMenu=Par nom de r\u00E9sidu

nucleicMenu=Nucl\u00E9ique
allNucleic=Tout
nucleicBackbone=Squelette
nucleicBases=Bases
DNA=ADN
RNA=ARN
atPairs=Paires AT
auPairs=Paires AU
gcPairs=Paires GC

heteroMenu=H\u00E9t\u00E9ro
allHetero=Tout
Solvent=Solvant
Water=Eau
exceptSolvent=Except\u00E9 le solvant
exceptWater=Except\u00E9 l'eau
Ligand=Ligand

otherMenu=Autre
Carbohydrate=Glucide
Lipid=Lipide
Other=Autre

byModelMenu=Mod\u00E8le
allModels=Tout les Mod\u00E8les

byFrameMenu=Trame
allFrames=Toutes les trames

invertSelection=Inverser la s\u00E9lection
restrictToSelection=Afficher uniquement la s\u00E9lection
showSelectionsCheckbox = Afficher les halos de s\u00E9lection


renderMenu=Rendu

renderSchemeMenu=Combinaison
renderCpkSpacefill=CPK Remplissage
renderBallAndStick=Boule et b\u00E2ton
renderSticks=B\u00E2tons
renderWireframe=Fil de fer
renderBackbone=Squelette

vectorMenu=Vecteurs
vectorOff=Off
vectorOn=On
vector3=3 pixels
vector005=0.05 \u00C5
vector01=0.1 \u00C5
vectorScale02=Echelle 0.2
vectorScale05=Echelle 0.5
vectorScale1=Echelle 1
vectorScale2=Echelle 2
vectorScale5=Echelle 5

atomMenu=Atomes
atomNone=Aucun
atom15=15% vanderWaals
atom20=20% vanderWaals
atom25=25% vanderWaals
atom50=50% vanderWaals
atom75=75% vanderWaals
atom100=100% vanderWaals


bondMenu=Liens
bondNone=Aucun
bondWireframe=Fil de fer
bond100=0.10 \u00C5
bond150=0.15 \u00C5
bond200=0.20 \u00C5
bond250=0.25 \u00C5
bond300=0.30 \u00C5

hbondMenu=Liens Hydrog\u00E8ne
hbondNone=Aucun
hbondWireframe=Fil de fer
hbondSidechain=Set H-Bonds Side Chain
hbondBackbone=Set H-Bonds Backbone
hbond100=0.10 \u00C5
hbond150=0.15 \u00C5
hbond200=0.20 \u00C5
hbond250=0.25 \u00C5
hbond300=0.30 \u00C5

ssbondMenu=Liens disulfure
ssbondNone=Aucun
ssbondWireframe=Fil de fer
ssbondSidechain=Set SS-Bonds Side Chain
ssbondBackbone=Set SS-Bonds Backbone
ssbond100=0.10 \u00C5
ssbond150=0.15 \u00C5
ssbond200=0.20 \u00C5
ssbond250=0.25 \u00C5
ssbond300=0.30 \u00C5

structureMenu=Structures
structureNone=Aucune
Backbone=Squelette
Trace=Trace
Cartoon=Cartoon
Ribbons=Rubans

labelMenu=Textes
labelNone=Aucun
labelSymbol=Avec le symbole de l'\u00E9l\u00E9ment
labelName=Avec le nom de l'atome
labelNumber=Avec le num�ro de l'atome
labelPositionMenu=Position du texte par rapport \u00E0 l'atome
labelCentered=Centr\u00E9
labelUpperRight=Haut droite
labelLowerRight=Bas droite
labelUpperLeft=Haut gauche
labelLowerLeft=Bas gauche


colorMenu=Couleur

colorAtomMenu=Atomes
colorAtomSchemeMenu=Par combinaison
colorAtomElement=El\u00E9ment (CPK)
colorAtomAminoAcids=Amino
colorAtomSecondaryStructure=Structure secondaire
colorAtomChain=Cha\u00EEne
colorAtomFormalCharge=Charge formelle
colorAtomPartialCharge=Charge partielle

colorAtomRedMenu=Rouge
colorAtomRed=Rouge
colorAtomCrimson=Cramoisi
colorAtomDarkRed=Rouge sombre
colorAtomFireBrick=Rouge brique
colorAtomIndianRed=Rouge indien
colorAtomDarkMagenta=Magenta fonc\u00E9
colorAtomDarkSalmon=Saumon fonc\u00E9
colorAtomLightSalmon=Saumon clair
colorAtomDeepPink=Rose fonc\u00E9
colorAtomLightPink=Rose clair

colorAtomYellowMenu=Jaune
colorAtomYellow=Jaune
colorAtomGold=Or
colorAtomGoldenrod=Dor\u00E9
colorAtomLemonChiffon=Jaune citron
colorAtomYellowGreen=Jaune-vert

colorAtomGreenMenu=Vert
colorAtomGreen=Vert
colorAtomLime=Lime
colorAtomSeaGreen=Vert d'eau
colorAtomGreenBlue=Vert-Bleu
colorAtomSpringGreen=Vert printemps

colorAtomBlueMenu=Bleu
colorAtomBlue=Bleu
colorAtomAqua=Aqua
colorAtomAzure=Azur
colorAtomCarolinaBlue=Bleu Caroline
colorAtomCadetBlue=Cadet Blue
colorAtomCornflowerBlue=Bleu barbeau
colorAtomDarkSlateBlue=Bleu ardoise fonc\u00E9
colorAtomLightSteelBlue=Bleu acier clair

colorAtomWhite=Blanc
colorAtomBlack=Noir

colorBondMenu=Liens
colorBondInherit=H\u00E9rite
colorBondBlack=Noir
colorBondWhite=Blanc
colorBondRed=Rouge
colorBondOrange=Orange
colorBondYellow=Jaune
colorBondGreen=Vert
colorBondBlue=Bleu
colorBondIndigo=Indigo
colorBondViolet=Violet
colorBondCyan=Cyan

colorHbondMenu=Liens Hydrog\u00E8ne
colorHbondInherit=H\u00E9rite
colorHbondBlack=Noir
colorHbondWhite=Blanc
colorHbondRed=Rouge
colorHbondOrange=Orange
colorHbondYellow=Jaune
colorHbondGreen=Vert
colorHbondBlue=Bleu
colorHbondIndigo=Indigo
colorHbondViolet=Violet
colorHbondCyan=Cyan

colorSSbondMenu=Liens disulfure
colorSSbondInherit=H\u00E9rite
colorSSbondBlack=Noir
colorSSbondWhite=Blanc
colorSSbondRed=Rouge
colorSSbondOrange=Orange
colorSSbondYellow=Jaune
colorSSbondGreen=Vert
colorSSbondBlue=Bleu
colorSSbondIndigo=Indigo
colorSSbondViolet=Violet
colorSSbondCyan=Cyan

colorBackboneMenu=Squelette
colorBackboneInherit=H\u00E9rite
colorBackboneSchemeMenu=Par combinaison
colorBackboneElement=El\u00E9ment (CPK)
colorBackboneAminoAcids=Amino
colorBackboneSecondaryStructure=Structure secondaire
colorBackboneChain=Cha\u00EEne
colorBackboneCharge=Charge
colorBackboneBlack=Noir
colorBackboneWhite=Blanc
colorBackboneRed=Rouge
colorBackboneOrange=Orange
colorBackboneYellow=Jaune
colorBackboneGreen=Vert
colorBackboneBlue=Bleu
colorBackboneIndigo=Indigo
colorBackboneViolet=Violet
colorBackboneCyan=Cyan

colorTraceMenu=Trace
colorTraceInherit=H\u00E9rite
colorTraceSchemeMenu=Par combinaison
colorTraceElement=El\u00E9ment (CPK)
colorTraceAminoAcids=Amino
colorTraceSecondaryStructure=Structure secondaire
colorTraceChain=Cha\u00EEne
colorTraceCharge=Charge
colorTraceBlack=Noir
colorTraceWhite=Blanc
colorTraceRed=Rouge
colorTraceOrange=Orange
colorTraceYellow=Jaune
colorTraceGreen=Vert
colorTraceBlue=Bleu
colorTraceIndigo=Indigo
colorTraceViolet=Violet
colorTraceCyan=Cyan

colorCartoonMenu=Cartoon
colorCartoonInherit=H\u00E9rite
colorCartoonSchemeMenu=Par combinaison
colorCartoonElement=El\u00E9ment (CPK)
colorCartoonAminoAcids=Amino
colorCartoonSecondaryStructure=Structure secondaire
colorCartoonChain=Cha\u00EEne
colorCartoonCharge=Charge
colorCartoonBlack=Noir
colorCartoonWhite=Blanc
colorCartoonRed=Rouge
colorCartoonOrange=Orange
colorCartoonYellow=Jaune
colorCartoonGreen=Vert
colorCartoonBlue=Bleu
colorCartoonIndigo=Indigo
colorCartoonViolet=Violet
colorCartoonCyan=Cyan

colorRibbonsMenu=Rubans
colorRibbonsInherit=H\u00E9rite
colorRibbonsSchemeMenu=Par combinaison
colorRibbonsElement=El\u00E9ment (CPK)
colorRibbonsAminoAcids=Amino
colorRibbonsSecondaryStructure=Structure secondaire
colorRibbonsChain=Cha\u00EEne
colorRibbonsCharge=Charge
colorRibbonsBlack=Noir
colorRibbonsWhite=Blanc
colorRibbonsRed=Rouge
colorRibbonsOrange=Orange
colorRibbonsYellow=Jaune
colorRibbonsGreen=Vert
colorRibbonsBlue=Bleu
colorRibbonsIndigo=Indigo
colorRibbonsViolet=Violet
colorRibbonsCyan=Cyan

colorLabelMenu=Textes
colorLabelInherit=H\u00E9rite
colorLabelBlack=Noir
colorLabelWhite=Blanc
colorLabelRed=Rouge
colorLabelOrange=Orange
colorLabelYellow=Jaune
colorLabelGreen=Vert
colorLabelBlue=Bleu
colorLabelIndigo=Indigo
colorLabelViolet=Violet
colorLabelCyan=Cyan

colorBackgroundMenu=Fond
colorBackgroundBlack=Noir
colorBackgroundWhite=Blanc
colorBackgroundRed=Rouge
colorBackgroundOrange=Orange
colorBackgroundYellow=Jaune
colorBackgroundGreen=Vert
colorBackgroundBlue=Bleu
colorBackgroundIndigo=Indigo
colorBackgroundViolet=Violet
colorBackgroundCyan=Cyan

colorVectorMenu=Vecteurs
colorVectorInherit=H\u00E9rite
colorVectorBlack=Noir
colorVectorWhite=Blanc
colorVectorRed=Rouge
colorVectorOrange=Orange
colorVectorYellow=Jaune
colorVectorGreen=Vert
colorVectorBlue=Bleu
colorVectorIndigo=Indigo
colorVectorViolet=Violet
colorVectorCyan=Cyan

zoomMenu=Zoom
zoom50=50%
zoom100=100%
zoom150=150%
zoom200=200%
zoom400=400%
zoom800=800%
zoomIn=Zoom avant
zoomOut=Zoom arri\u00E8re

spinMenu=Rotation
spinOn=On
spinOff=Off
setSpinXMenu=Changer la vitesse X
spinx0=0
spinx5=5
spinx10=10
spinx20=20
spinx30=30
spinx40=40
spinx50=50
setSpinYMenu=Changer la vitesse Y
spiny0=0
spiny5=5
spiny10=10
spiny20=20
spiny30=30
spiny40=40
spiny50=50
setSpinZMenu=Changer la vitesse Z
spinz0=0
spinz5=5
spinz10=10
spinz20=20
spinz30=30
spinz40=40
spinz50=50

setSpinFpsMenu=Changer FPS
spinfps5=5
spinfps10=10
spinfps20=20
spinfps30=30
spinfps50=50


animateMenu=Animer
setAnimModeMenu=Mode d'Animation
OnceThrough=Une fois
Palindrome=Palindrome
Loop=En boucle
play=Lancer
stop=Arr\u00EAter
nextframe=Trame suivante
prevframe=Trame pr\u00E9c\u00E9dente
rewind=Revenir au d\u00E9but
revplay=En arri\u00E8
setAnimFpsMenu=Changer FPS
animfps5=5
animfps10=10
animfps20=20
animfps30=30
animfps50=50

measurementsMenu=Mesures

distanceNanometers=Nanom\u00E8tres
distanceAngstroms=Angstr\u00F6ms
distancePicometers=Picom\u00E8tres

crystalMenu=Cristal
axesMenu=Axes
bbcageMenu=Bo\u00EEte englobante
uccageMenu=Cellule unitaire

axesOff=Masquer
axesDotted=Pointill\u00E9
axesByPixelMenu=Largeur en Pixels
axesByAngstromMenu=Largeur en Angstr\u00F6ms
colorAxesMenu=Couleur
axes1p=1 px
axes3p=3 px
axes5p=5 px
axes10p=10 px
axes10a=0.10 \u00C5
axes20a=0.20 \u00C5
axes25a=0.25 \u00C5
axes50a=0.50 \u00C5
axes100a=1.0 \u00C5
colorAxesGray=Gris
colorAxesSlateBlue=Bleu ardoise
colorAxesGold=Or
colorAxesOrchid=Orchid\u00E9e

bbcageOff=Masquer
bbcageDotted=Pointill\u00E9
bbcageByPixelMenu=Largeur en Pixels
bbcageByAngstromMenu=Largeur en Angstr\u00F6ms
colorBbcageMenu=Couleur
bbcage1p=1 px
bbcage3p=3 px
bbcage5p=5 px
bbcage10p=10 px
bbcage10a=0.10 \u00C5
bbcage20a=0.20 \u00C5
bbcage25a=0.25 \u00C5
bbcage50a=0.50 \u00C5
bbcage100a=1.0 \u00C5
colorBbcageGray=Gris
colorBbcageSalmon=Saumon
colorBbcageOlive=Olive
colorBbcageMaroon=Marron

uccageOff=Masquer
uccageDotted=Pointill\u00E9
uccageByPixelMenu=Largeur en Pixels
uccageByAngstromMenu=Largeur en Angstr\u00F6ms
colorUccageMenu=Couleur
uccage1p=1 px
uccage3p=3 px
uccage5p=5 px
uccage10p=10 px
uccage10a=0.10 \u00C5
uccage20a=0.20 \u00C5
uccage25a=0.25 \u00C5
uccage50a=0.50 \u00C5
uccage100a=1.0 \u00C5
colorUccageGray=Gris
colorUccageAquamarine=Aigue marine
colorUccageForestGreen=Vert for\u00EAt
colorUccageHotPink=Rose vif


optionsMenu=Options
orientationRasMolChimeCheckbox=Axes RasMol/Chime
wireframeRotationCheckbox=Rotation fil de fer
perspectiveDepthCheckbox=Profondeur de la perspective
showHydrogensCheckbox = Afficher les Hydrog\u00E8nes
showMeasurementsCheckbox = Afficher les mesures
rasmolChimeCompatibility=Compatibilit\u00E9 Rasmol/Chime
rasmolColors=Couleurs Rasmol
jmolColors=Couleurs Jmol
axesOrientationRasmolCheckbox=Orientation des axes Rasmol
zeroBasedXyzRasmolCheckbox=Origine XYZ Rasmol

testFlag1Checkbox=Test Flag 1
testFlag2Checkbox=Test Flag 2
testFlag3Checkbox=Test Flag 3

consoleMenu=Console...
consoleOn=Ouvrir
consoleOff=Fermer

aboutMenu=A propos de Jmol
jmolUrl=www.jmol.org
