# Supplementary material
Source: publisher figshare collection journal article supplement (https://acs.figshare.com/ndownloader/files/5101216)
Supplement: Supplementary file 1 [file 5101216 › org/openscience/jmol/ui/JmolPopupWords_nl.properties]

# Localized texts for the Jmol popup menu.
# Dutch translation for the Netherlands (nl_NL)
# Translated from default version : Jmol.properties (v 1.28)
# $Id: JmolPopupWords_nl.properties,v 1.2 2004/11/19 10:36:18 egonw Exp $

# File How to (beginning) -----------------------------------------------------
# The howto can be found in ../Properties/Jmol.properties
# File How to (end) -----------------------------------------------------------

selectMenu=Selecteren

setSelectModeMenu=Kies Selectiemodus
replace=Vervang Selectie
add=Toevoegen aan Selectie (OF)
narrow=Verklein Selectie (EN)

selectAll=Alles
selectNone=Geen

elementsComputedMenu=Element

proteinMenu=Prote\u00EFne
allProtein=Alles
proteinBackbone=Backbone
proteinSideChains=Zijketens
polar=Polaire Residuen
nonpolar=Niet-polaire Residuen
positiveCharge=Basische Residuen (+)
negativeCharge=Zure Residuen (-)
noCharge=Ongeladen Residuen
aaresiduesComputedMenu=Specifieke Residunaam

nucleicMenu=Nucle\u00EFnezuur
allNucleic=Alles
nucleicBackbone=Backbone
nucleicBases=Basen
atPairs=AT paren
auPairs=AU paren
gcPairs=GC paren

heteroMenu=Hetero-groepen
allHetero=Alles
exceptSolvent=Behalve Oplosmiddel
exceptWater=Behalve Water

otherMenu=Anders

byModelMenu=Model
allModels=Alle Modelen

byFrameMenu=Frame
allFrames=Alle Frames

invertSelection=Inverteer Selectie
restrictToSelection=Laat alleen Selectie zien
showSelectionsCheckbox = Halos voor Selecties


renderMenu=Render

renderSchemeMenu=Schema
renderCpkSpacefill=CPK Spacefill
renderBallAndStick=Bal en Stok
renderSticks=Stokjes
renderWireframe=Draadmodel
renderBackbone=Backbone

vectorMenu=Vectoren
vectorOff=Uit
vectorOn=Aan
vector3=3 pixels
vector005=0.05 \u00C5
vector01=0.1 \u00C5
vectorScale02=Schaal 0.2
vectorScale05=Schaal 0.5
vectorScale1=Schaal 1
vectorScale2=Schaal 2
vectorScale5=Schaal 5

atomMenu=Atomen
atomNone=Uit
atom15=15% vanderWaals
atom20=20% vanderWaals
atom25=25% vanderWaals
atom50=50% vanderWaals
atom75=75% vanderWaals
atom100=100% vanderWaals


bondMenu=Bindingen
bondNone=Uit
bondWireframe=Aan
bond100=0.10 \u00C5
bond150=0.15 \u00C5
bond200=0.20 \u00C5
bond250=0.25 \u00C5
bond300=0.30 \u00C5

hbondMenu=Waterstofbruggen
hbondNone=Uit
hbondWireframe=Aan
hbondSidechain=Kies H-bruggen van zijketens
hbondBackbone=Kies H-bruggen van backbone
hbond100=0.10 \u00C5
hbond150=0.15 \u00C5
hbond200=0.20 \u00C5
hbond250=0.25 \u00C5
hbond300=0.30 \u00C5

ssbondMenu=Disulfide-bindingen
ssbondNone=Uit
ssbondWireframe=Aan
ssbondSidechain=Kies SS-bindingen van zijketens
ssbondBackbone=Kies SS-bindingen van backbone
ssbond100=0.10 \u00C5
ssbond150=0.15 \u00C5
ssbond200=0.20 \u00C5
ssbond250=0.25 \u00C5
ssbond300=0.30 \u00C5

structureMenu=Structuren
structureNone=Uit
trace=Spoor
cartoon=Tekening
ribbons=Banden

labelMenu=Labels
labelNone=Geen
labelSymbol=Met Symbool
labelName=Met Atoomnaam
labelNumber=Met Atoomnummber
labelPositionMenu=Positie van Label op Atoom
labelCentered=Gecentreerd
labelUpperRight=Rechtsboven
labelLowerRight=Rechtsonder
labelUpperLeft=Linksboven
labelLowerLeft=Linksonder


colorMenu=Kleuren

colorAtomMenu=Atomen
colorAtomSchemeMenu=Volgens model
colorAtomElement=Element (CPK)
colorAtomAminoAcids=Amino
colorAtomSecondaryStructure=Secondaire Structuur
colorAtomChain=Keten
colorAtomFormalCharge=Formele lading
colorAtomPartialCharge=Partiele lading

colorAtomRedMenu=Rood
colorAtomRed=Rood
colorAtomCrimson=Crimson
colorAtomDarkRed=Donkerrood
colorAtomFireBrick=Firebrick
colorAtomIndianRed=Indian Red
colorAtomDarkMagenta=Dark Magenta
colorAtomDarkSalmon=Dark Salmon
colorAtomLightSalmon=Light Salmon
colorAtomDeepPink=Deep Pink
colorAtomLightPink=Light Pink

colorAtomYellowMenu=Geel
colorAtomYellow=Geel
colorAtomGold=Goud
colorAtomGoldenrod=Goldenrod
colorAtomLemonChiffon=Lemon Chiffon
colorAtomYellowGreen=Yellow-Green

colorAtomGreenMenu=Groen
colorAtomGreen=Groen
colorAtomLime=Lime
colorAtomSeaGreen=Seagreen
colorAtomGreenBlue=Green-Blue
colorAtomSpringGreen=Spring Green

colorAtomBlueMenu=Blauw
colorAtomBlue=Blauw
colorAtomAqua=Aqua
colorAtomAzure=Azure
colorAtomCarolinaBlue=Carolina Blue
colorAtomCadetBlue=Cadet Blue
colorAtomCornflowerBlue=Cornflower
colorAtomDarkSlateBlue=Dark Slate Blue
colorAtomLightSteelBlue=Light Steel Blue

colorAtomWhite=Wit
colorAtomBlack=Zwart

colorBondMenu=Bindingen
colorBondInherit=Overnemen
colorBondBlack=Zwart
colorBondWhite=Wit
colorBondRed=Rood
colorBondOrange=Oranje
colorBondYellow=Geel
colorBondGreen=Groen
colorBondBlue=Blauw
colorBondIndigo=Indigo
colorBondViolet=Violet
colorBondCyan=Cyaan

colorHbondMenu=Waterstofbruggen
colorHbondInherit=Overnemen
colorHbondBlack=Zwart
colorHbondWhite=Wit
colorHbondRed=Rood
colorHbondOrange=Oranje
colorHbondYellow=Geel
colorHbondGreen=Groen
colorHbondBlue=Blauw
colorHbondIndigo=Indigo
colorHbondViolet=Violet
colorHbondCyan=Cyaan

colorSSbondMenu=Disulfide-bindingen
colorSSbondInherit=Overnemen
colorSSbondBlack=Zwart
colorSSbondWhite=Wit
colorSSbondRed=Rood
colorSSbondOrange=Oranje
colorSSbondYellow=Geel
colorSSbondGreen=Groen
colorSSbondBlue=Blauw
colorSSbondIndigo=Indigo
colorSSbondViolet=Violet
colorSSbondCyan=Cyaan

colorBackboneMenu=Backbone
colorBackboneInherit=Overnemen
colorBackboneSchemeMenu=Volgens Model
colorBackboneElement=Element (CPK)
colorBackboneAminoAcids=Amino
colorBackboneSecondaryStructure=Secondaire Structuur
colorBackboneChain=Keten
colorBackboneCharge=Lading
colorBackboneBlack=Zwart
colorBackboneWhite=Wit
colorBackboneRed=Rood
colorBackboneOrange=Oranje
colorBackboneYellow=Geel
colorBackboneGreen=Groen
colorBackboneBlue=Blauw
colorBackboneIndigo=Indigo
colorBackboneViolet=Violet
colorBackboneCyan=Cyaan

colorTraceMenu=Trace
colorTraceInherit=Overnemen
colorTraceSchemeMenu=Volgens Model
colorTraceElement=Element (CPK)
colorTraceAminoAcids=Amino
colorTraceSecondaryStructure=Secondaire Structuur
colorTraceChain=Keten
colorTraceCharge=Lading
colorTraceBlack=Zwart
colorTraceWhite=Wit
colorTraceRed=Rood
colorTraceOrange=Oranje
colorTraceYellow=Geel
colorTraceGreen=Groen
colorTraceBlue=Blauw
colorTraceIndigo=Indigo
colorTraceViolet=Violet
colorTraceCyan=Cyaan

colorCartoonMenu=Tekening
colorCartoonInherit=Overnemen
colorCartoonSchemeMenu=Volgens Model
colorCartoonElement=Element (CPK)
colorCartoonAminoAcids=Amino
colorCartoonSecondaryStructure=Secondaire Structuur
colorCartoonChain=Keten
colorCartoonCharge=Lading
colorCartoonBlack=Zwart
colorCartoonWhite=Wit
colorCartoonRed=Rood
colorCartoonOrange=Oranje
colorCartoonYellow=Geel
colorCartoonGreen=Groen
colorCartoonBlue=Blauw
colorCartoonIndigo=Indigo
colorCartoonViolet=Violet
colorCartoonCyan=Cyaan

colorRibbonsMenu=Ribbons
colorRibbonsInherit=Overnemen
colorRibbonsSchemeMenu=Volgens Model
colorRibbonsElement=Element (CPK)
colorRibbonsAminoAcids=Amino
colorRibbonsSecondaryStructure=Secondaire Structuur
colorRibbonsChain=Keten
colorRibbonsCharge=Lading
colorRibbonsBlack=Zwart
colorRibbonsWhite=Wit
colorRibbonsRed=Rood
colorRibbonsOrange=Oranje
colorRibbonsYellow=Geel
colorRibbonsGreen=Groen
colorRibbonsBlue=Blauw
colorRibbonsIndigo=Indigo
colorRibbonsViolet=Violet
colorRibbonsCyan=Cyaan

colorLabelMenu=Labels
colorLabelInherit=Overnemen
colorLabelBlack=Zwart
colorLabelWhite=Wit
colorLabelRed=Rood
colorLabelOrange=Oranje
colorLabelYellow=Geel
colorLabelGreen=Groen
colorLabelBlue=Blauw
colorLabelIndigo=Indigo
colorLabelViolet=Violet
colorLabelCyan=Cyaan

colorBackgroundMenu=Achtergrond
colorBackgroundBlack=Zwart
colorBackgroundWhite=Wit
colorBackgroundRed=Rood
colorBackgroundOrange=Oranje
colorBackgroundYellow=Geel
colorBackgroundGreen=Groen
colorBackgroundBlue=Blauw
colorBackgroundIndigo=Indigo
colorBackgroundViolet=Violet
colorBackgroundCyan=Cyaan

colorVectorMenu=Vectoren
colorVectorInherit=Overnemen
colorVectorBlack=Zwart
colorVectorWhite=Wit
colorVectorRed=Rood
colorVectorOrange=Oranje
colorVectorYellow=Geel
colorVectorGreen=Groen
colorVectorBlue=Blauw
colorVectorIndigo=Indigo
colorVectorViolet=Violet
colorVectorCyan=Cyan

zoomMenu=Inzoomen
zoom50=50%
zoom100=100%
zoom150=150%
zoom200=200%
zoom400=400%
zoom800=800%
zoomIn=Inzoomen
zoomOut=Uitzoomen

spinMenu=Spin
spinOn=Aan
spinOff=Uit
setSpinXMenu=Stel X-snelheid in
spinx0=0
spinx5=5
spinx10=10
spinx20=20
spinx30=30
spinx40=40
spinx50=50
setSpinYMenu=Stel Y-snelheid in
spiny0=0
spiny5=5
spiny10=10
spiny20=20
spiny30=30
spiny40=40
spiny50=50
setSpinZMenu=Stel Z-snelheid in
spinz0=0
spinz5=5
spinz10=10
spinz20=20
spinz30=30
spinz40=40
spinz50=50

setSpinFpsMenu=Stel FPS in
spinfps5=5
spinfps10=10
spinfps20=20
spinfps30=30
spinfps50=50


animateMenu=Animatie
setAnimModeMenu=Animatie-modus
OnceThrough=Eenmaal afspelen
play=Afspelen
stop=Stoppen
nextframe=Volgende Frame
prevframe=Vorige Frame
rewind=Terugspoelen
revplay=Achteruitspelem
setAnimFpsMenu=Stel FPS in
animfps5=5
animfps10=10
animfps20=20
animfps30=30
animfps50=50

measurementsMenu=Metingen

distanceNanometers=Nanometers
distanceAngstroms=Angstroms
distancePicometers=Picometers

crystalMenu=Kristal
axesMenu=Assen
bbcageMenu=Boundbox
uccageMenu=Eenheidscel

axesOff=Onzichtbaar
axesDotted=Puntjes
axesByPixelMenu=Puntgrootte
axesByAngstromMenu=Angstrombreedte
colorAxesMenu=Kleuren
axes1p=1 px
axes3p=3 px
axes5p=5 px
axes10p=10 px
axes10a=0.10 \u00C5
axes20a=0.20 \u00C5
axes25a=0.25 \u00C5
axes50a=0.50 \u00C5
axes100a=1.0 \u00C5
colorAxesGray=Grijs
colorAxesSlateBlue=Blauw
colorAxesGold=Goud
colorAxesOrchid=Orchidee

bbcageOff=Onzichtbaar
bbcageDotted=Puntjes
bbcageByPixelMenu=Puntgrootte
bbcageByAngstromMenu=Angstrombreedte
colorBbcageMenu=Kleuren
bbcage1p=1 px
bbcage3p=3 px
bbcage5p=5 px
bbcage10p=10 px
bbcage10a=0.10 \u00C5
bbcage20a=0.20 \u00C5
bbcage25a=0.25 \u00C5
bbcage50a=0.50 \u00C5
bbcage100a=1.0 \u00C5
colorBbcageGray=Grijs
colorBbcageSalmon=Zalm
colorBbcageOlive=Olijfgroen
colorBbcageMaroon=Maroon

uccageOff=Onzichtbaar
uccageDotted=Puntjes
uccageByPixelMenu=Puntgrootte
uccageByAngstromMenu=Angstrombreedte
colorUccageMenu=Kleuren
uccage1p=1 px
uccage3p=3 px
uccage5p=5 px
uccage10p=10 px
uccage10a=0.10 \u00C5
uccage20a=0.20 \u00C5
uccage25a=0.25 \u00C5
uccage50a=0.50 \u00C5
uccage100a=1.0 \u00C5
colorUccageGray=Grijs
colorUccageAquamarine=Aquamarijn
colorUccageForestGreen=Groen
colorUccageHotPink=Fel roze


optionsMenu=Opties
orientationRasMolChimeCheckbox=Assen zoals in RasMol/Chime
wireframeRotationCheckbox=Draadmodelrotatie
perspectiveDepthCheckbox=Perspectiefdiepte
showHydrogensCheckbox = Laat waterstoffen zien
showMeasurementsCheckbox = Laat metingen zien

testFlag1Checkbox=Testvlag 1
testFlag2Checkbox=Testvlag 2
testFlag3Checkbox=Testvlag 3
